# Supplementary material for: Cs4Mo5P2O22: a first Strandberg-type POM with 1D straight chains of polymerized [Mo5P2O23]6−units and moderate second harmonic generation response
Source: Royal Society of Chemistry journal article supplement (doi:10.1039/c2cc36354b), 2012-10-25
Supplement: c2cc36354b.pdf [file c2cc36354b.pdf]

**Cs<sub>4</sub>Mo<sub>5</sub>P<sub>2</sub>O<sub>22</sub>: A First Strandberg-Type POM with 1D straight chains  
of polymerized [Mo<sub>5</sub>P<sub>2</sub>O<sub>23</sub>]<sup>6-</sup> units and Moderate Second Harmonic  
Generation Response**

(Supporting Information: 14 pages)

Ying Wang,<sup>ab</sup> Shilie Pan,<sup>\*a</sup> Hongwei Yu,<sup>ab</sup> Xin Su,<sup>a</sup> Min Zhang<sup>a</sup>, Fangfang Zhang<sup>a</sup>  
and Jian Han<sup>\*a</sup>

<sup>a</sup> *Xinjiang Key Laboratory of Electronic Information Materials and Devices, Xinjiang  
Technical Institute of Physics & Chemistry, Chinese Academy of Sciences, 40-1 South  
Beijing Road, Urumqi 830011, China;*

<sup>b</sup> *University of Chinese Academy of Sciences, Beijing 100039, China;*

\*To whom correspondence should be addressed. Phone: (86)991-3674558.

Fax: (86)991-3838957. E-mail: slpan@ms.xjb.ac.cn (S. Pan).

|                                                                                                                                                 |             |
|-------------------------------------------------------------------------------------------------------------------------------------------------|-------------|
| <b>Section S1. Synthesis and general characterization</b>                                                                                       | <b>S-2</b>  |
| <b>Section S2. Single crystal X-ray diffraction data collection,<br/>Structure solution and refinement procedures</b>                           | <b>S-4</b>  |
| <b>Section S3. IR Spectroscopy</b>                                                                                                              | <b>S-9</b>  |
| <b>Section S4. UV-Vis-NIR diffuse-reflectance spectroscopy</b>                                                                                  | <b>S-10</b> |
| <b>Section S5. Second-harmonic generation measurements</b>                                                                                      | <b>S-11</b> |
| <b>Section S6. Out-of-center distortion and local dipole<br/>moment calculation for Cs<sub>4</sub>Mo<sub>5</sub>P<sub>2</sub>O<sub>22</sub></b> | <b>S-12</b> |
| <b>Section S7. Comparison of the DSC curves</b>                                                                                                 | <b>S-13</b> |
| <b>Section S8. References</b>                                                                                                                   | <b>S-14</b> |

## Section S1. Synthesis and general characterization

**Synthesis of Cs<sub>4</sub>Mo<sub>5</sub>P<sub>2</sub>O<sub>22</sub>:** All reagents for synthesis were commercially available and used as received. Polycrystalline samples of Cs<sub>4</sub>Mo<sub>5</sub>P<sub>2</sub>O<sub>22</sub> were synthesized via solid-state reactions of the stoichiometric starting components (0.02mol) of Cs<sub>2</sub>CO<sub>3</sub> (99.0%), MoO<sub>3</sub> (99.5%) and NH<sub>4</sub>H<sub>2</sub>PO<sub>4</sub> (99.5%). The sample was placed in an alumina crucible and heated to 500 °C slowly in air, held for 3 d with several intermediate grindings and mixings. Purity was confirmed by PXRD. The single crystals of Cs<sub>4</sub>Mo<sub>5</sub>P<sub>2</sub>O<sub>22</sub> were grown by spontaneous crystallization from the melt of polycrystalline samples (5g). The reaction was completed in a platinum crucible under air by applying the following temperature program: heating up to 700 °C in air, holding at this temperature for 24 h, cooling slowly down to 450 °C (2 °C/h), before rapid cooling to RT. Several colorless block crystals were separated mechanically from the crucible for the further structural characterization.

**General characterization:** PXRD data were collected on a Bruker D2 PHASER diffractometer with Cu K $\alpha$  radiation ( $\lambda = 1.5418 \text{ \AA}$ ) at room temperature. The  $2\theta$  range was 5-70° with a step size of 0.02° and a fixed counting time of 1s/step. Vibrational spectra were obtained at room temperature via a Shimadzu IR Affinity-1 Fourier transform infrared spectrometer. The sample was mixed thoroughly with dried KBr (5 mg of the sample, 500 mg of KBr). It was collected in a range from 400 to 4000

$\text{cm}^{-1}$  with a resolution of  $4 \text{ cm}^{-1}$ . The UV-Vis-NIR optical diffuse reflectance spectrum was measured at room temperature with a Shimadzu SolidSpec-3700DUV spectrophotometer. Data were collected in the wavelength range 250-2600 nm. The reflectance spectrum was converted to absorbance with the Kubelka–Munk function.<sup>S1</sup> Thermal analysis was carried out on NETZSCH STA 449C instrument at a temperature range of 40 - 800 °C with a heating rate of 5 °C /min in an atmosphere of flowing  $\text{N}_2$ .

## **Section S2. Single crystal X-ray diffraction data collection, structure solution and refinement procedures**

Single-crystal X-ray diffraction data were collected on a Bruker SMART APEX II CCD diffractometer using monochromatic Mo K $\alpha$  radiation ( $\lambda = 0.71073 \text{ \AA}$ ). A colorless block crystal of Cs<sub>4</sub>Mo<sub>5</sub>P<sub>2</sub>O<sub>22</sub> (dimensions 0.047 mm  $\times$  0.10 mm  $\times$  0.165 mm) was glued on to a glass fiber at room-temperature. A total of 7424 reflections were collected of which 2833 were independent in the range  $2.30 < \theta < 27.77^\circ$ . The reduction of data was carried out with the Bruker Suite software package. Face-indexed absorption correction was performed numerically with the program SADABS.<sup>S2</sup> The crystal structure of Cs<sub>4</sub>Mo<sub>5</sub>P<sub>2</sub>O<sub>22</sub> was solved by direct methods using the SHELXTL program package with anisotropic displacement parameters for all atoms.<sup>S3</sup> The structure was examined using the *Adsym* subroutine of PLATON to assure that no additional symmetry could be applied to the models.<sup>S4</sup> Crystal data and structure refinement information are given in Table S1. Selected bond lengths for Cs<sub>4</sub>Mo<sub>5</sub>P<sub>2</sub>O<sub>22</sub> are listed in Table S2.

**Table S1.** Crystal data and structure refinement for Cs<sub>4</sub>Mo<sub>5</sub>P<sub>2</sub>O<sub>22</sub>

|                                                             |                                                                |
|-------------------------------------------------------------|----------------------------------------------------------------|
| Empirical formula                                           | Cs <sub>4</sub> Mo <sub>5</sub> P <sub>2</sub> O <sub>22</sub> |
| Formula weight                                              | 1425.28                                                        |
| Temperature                                                 | 296(2) K                                                       |
| Crystal system                                              | Orthorhombic                                                   |
| Space group                                                 | C222 <sub>1</sub>                                              |
| <i>a</i> / Å                                                | 6.622(5)                                                       |
| <i>b</i> / Å                                                | 20.485(15)                                                     |
| <i>c</i> / Å                                                | 17.748(13)                                                     |
| Volume / Å <sup>3</sup>                                     | 2408(3)                                                        |
| Z                                                           | 4                                                              |
| $\rho_{\text{calcd}} / \text{g}\cdot\text{cm}^{-3}$         | 3.932                                                          |
| $\mu / \text{mm}^{-1}$                                      | 8.715                                                          |
| F(000)                                                      | 2544                                                           |
| Crystal size / mm <sup>3</sup>                              | 0.165 × 0.10 × 0.047                                           |
| $\Theta$ range for data collection                          | 2.30 to 27.77°                                                 |
| Index ranges                                                | -8 ≤ <i>h</i> ≤ 7, -23 ≤ <i>k</i> ≤ 26, -23 ≤ <i>l</i> ≤ 19    |
| Reflections collected                                       | 7424                                                           |
| Independent reflections                                     | 2833 [R(int) = 0.0406]                                         |
| Completeness to theta = 27.77                               | 99.4 %                                                         |
| Data / restraints / parameters                              | 2833 / 0 / 153                                                 |
| Goodness-of-fit on F <sup>2</sup>                           | 1.009                                                          |
| Final R indices [ <i>I</i> > 2σ( <i>I</i> )] <sup>[a]</sup> | R <sub>1</sub> = 0.0314, wR <sub>2</sub> = 0.0483              |
| Final R indices (all data) <sup>[a]</sup>                   | R <sub>1</sub> = 0.0383, wR <sub>2</sub> = 0.0503              |
| Largest diff. peak/hole / e·Å <sup>-3</sup>                 | 0.971 and -0.905                                               |
| Absolute structure parameter                                | 0.03(2)                                                        |

<sup>[a]</sup>R<sub>1</sub> =  $\sum ||F_o| - |F_c|| / \sum |F_o|$  and wR<sub>2</sub> =  $[\sum w(F_o^2 - F_c^2)^2 / \sum w F_o^4]^{1/2}$  for  $F_o^2 > 2\sigma(F_o^2)$ .

**Table S2.** Selected bond lengths (Å) for Cs<sub>4</sub>Mo<sub>5</sub>P<sub>2</sub>O<sub>22</sub>.

|               |          |                |          |
|---------------|----------|----------------|----------|
| Cs(1)-O(2)    | 2.960(5) | Cs(3)-O(9)     | 3.378(6) |
| Cs(1)-O(2)#1  | 2.960(5) | Mo(1)-O(8)     | 1.694(5) |
| Cs(1)-O(4)#1  | 2.973(5) | Mo(1)-O(6)     | 1.704(6) |
| Cs(1)-O(4)    | 2.973(5) | Mo(1)-O(10)#11 | 1.903(4) |
| Cs(1)-O(6)    | 3.068(6) | Mo(1)-O(7)     | 1.906(2) |
| Cs(1)-O(6)#1  | 3.068(6) | Mo(1)-O(2)#3   | 2.328(5) |
| Cs(1)-O(8)#2  | 3.280(6) | Mo(1)-O(3)     | 2.485(5) |
| Cs(1)-O(8)#3  | 3.280(6) | Mo(2)-O(4)     | 1.699(5) |
| Cs(1)-O(7)    | 3.439(3) | Mo(2)-O(4)#1   | 1.699(5) |
| Cs(1)-O(7)#2  | 3.439(3) | Mo(2)-O(5)     | 1.910(5) |
| Cs(2)-O(4)#1  | 2.919(5) | Mo(2)-O(5)#1   | 1.910(5) |
| Cs(2)-O(11)#4 | 2.972(5) | Mo(2)-O(12)#2  | 2.267(5) |
| Cs(2)-O(5)#5  | 2.987(5) | Mo(2)-O(12)#3  | 2.267(5) |
| Cs(2)-O(11)#2 | 3.203(6) | Mo(3)-O(9)     | 1.692(5) |
| Cs(2)-O(9)    | 3.324(6) | Mo(3)-O(11)    | 1.708(5) |
| Cs(2)-O(8)    | 3.353(6) | Mo(3)-O(10)    | 1.923(4) |
| Cs(3)-O(6)#6  | 3.174(6) | Mo(3)-O(5)#5   | 1.930(5) |
| Cs(3)-O(6)#7  | 3.174(6) | Mo(3)-O(3)#6   | 2.263(5) |
| Cs(3)-O(8)#4  | 3.249(6) | Mo(3)-O(12)    | 2.364(4) |
| Cs(3)-O(8)#8  | 3.249(6) | P(1)-O(2)      | 1.500(5) |
| Cs(3)-O(10)#9 | 3.318(5) | P(1)-O(3)      | 1.526(5) |
| Cs(3)-O(10)#2 | 3.318(5) | P(1)-O(12)#12  | 1.529(5) |
| Cs(3)-O(9)#10 | 3.378(6) | P(1)-O(1)      | 1.597(3) |

Symmetry transformations used to generate equivalent atoms:

#1 -x+1,y,-z+1/2; #2 x+1,y,z; #3 -x,y,-z+1/2; #4 x+1/2,-y+3/2,-z; #5 x-1,y,z; #6 x-1/2,y+1/2,z; #7 x-1/2,-y+3/2,-z; #8 x+1/2,y+1/2,z; #9 x+1,-y+2,-z; #10 x,-y+2,-z; #11 x+1/2,y-1/2,z; #12 -x-1/2,y-1/2,-z+1/2.

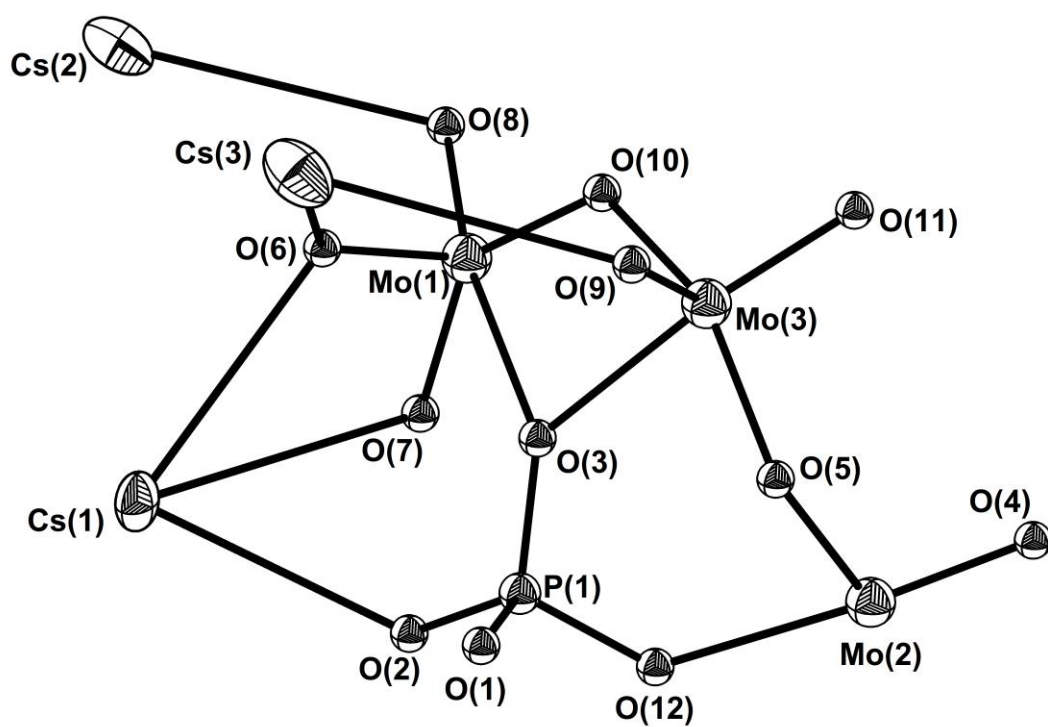

**Fig. S1** ORTEP drawing of the asymmetric unit of  $\text{Cs}_4\text{Mo}_5\text{P}_2\text{O}_{22}$ . Thermal ellipsoids are drawn at a 50% probability level.

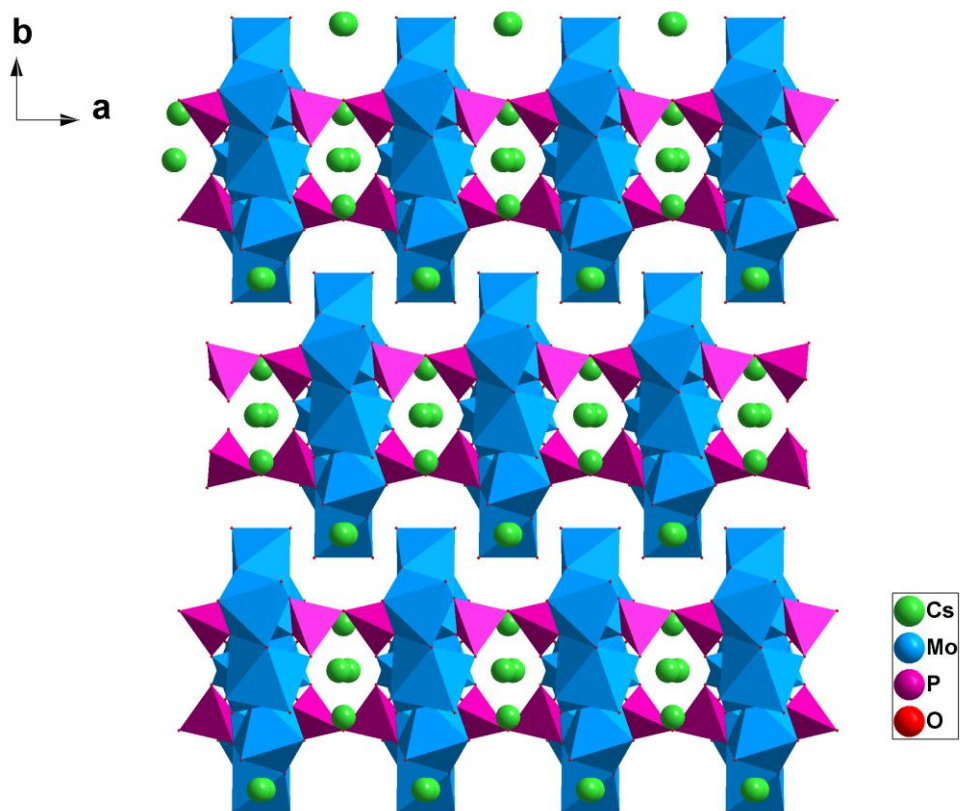

**Fig. S2** The polyhedra representation of  $\text{Cs}_4\text{Mo}_5\text{P}_2\text{O}_{22}$  along the  $[001]$  direction. The figure shows the crystallographic  $2_1$  screw axis in the  $c$  direction.



### Section S3. IR Spectroscopy

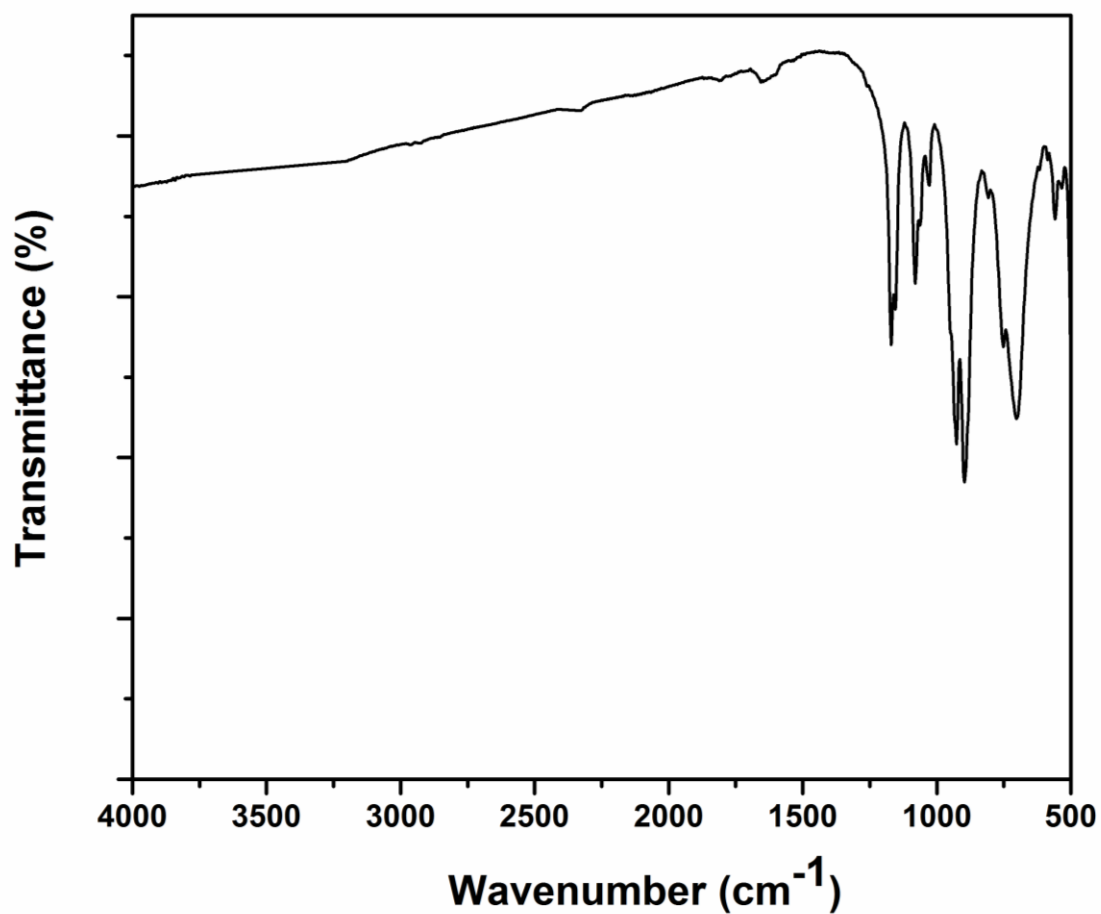

**Fig. S3** IR Spectroscopy of as-synthesized Cs<sub>4</sub>Mo<sub>5</sub>P<sub>2</sub>O<sub>22</sub>. Characteristic FTIR bands at 1170 and 1078 cm<sup>-1</sup> confirmed the presence of P-O-P bridges, and bands at 927, 891, 704, and 559 cm<sup>-1</sup> are characteristic of phosphomolybdate anion.

### Section S4. UV-Vis-NIR diffuse-reflectance spectroscopy

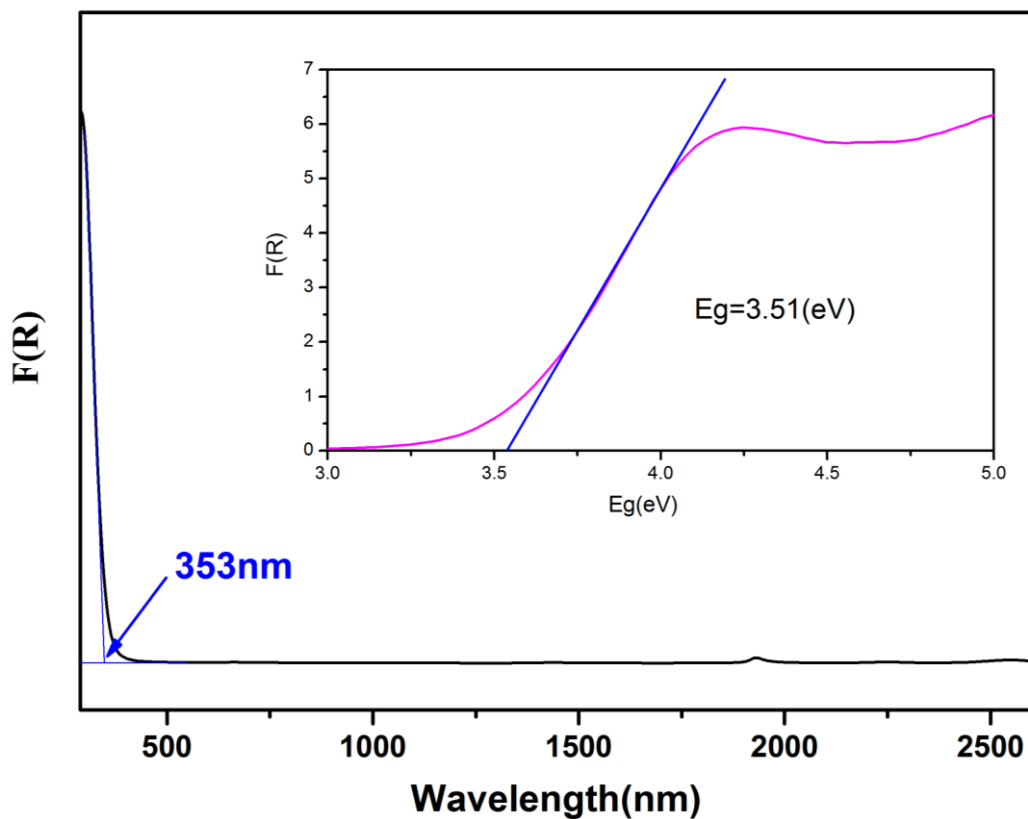

**Fig. S4** UV-Vis-NIR diffuse-reflectance spectroscopy of  $\text{Cs}_4\text{Mo}_5\text{P}_2\text{O}_{22}$ .

### **Section S5. Second-harmonic generation measurements**

Second-harmonic generation (SHG) test was performed on a modified Kurtz-NLO system.<sup>S5</sup> About 100 mg of the powder samples were hand-pressed into a 1 cm diameter round box with two glass windows, which were irradiated with a pulsed infrared beam (1064 nm, 10 ns, 10 kHz) produced by a Q-switched Nd: YAG laser. A 532 nm filter was used to absorb the fundamental light and pass the visible light onto a photomultiplier. A digital oscilloscope was used to receive the laser SHG signal. Because the SHG efficiency has been shown to depend on particle size,<sup>S6</sup> polycrystalline samples were ground and sieved into distinct particle size ranges: <20, 20–38, 38–55, 55–88, 88–105, 105–150, and 150–200  $\mu\text{m}$ , and the microcrystalline KDP (150–200  $\mu\text{m}$ ) also served as a reference.

## Section S6. Out-of-center distortion and local dipole moment

### calculation for Cs<sub>4</sub>Mo<sub>5</sub>P<sub>2</sub>O<sub>22</sub>

**Table S3.** The direction and magnitude of the MoO<sub>6</sub>, PO<sub>4</sub>, and CsO<sub>n</sub> (n=10, 6, and 8) polyhedra in Cs<sub>4</sub>Mo<sub>5</sub>P<sub>2</sub>O<sub>22</sub>

| species                                                                             | octahedron distortion,<br>$\Delta_d^{[a]}$ |           | dipole moment |         |         |       |                                                            |
|-------------------------------------------------------------------------------------|--------------------------------------------|-----------|---------------|---------|---------|-------|------------------------------------------------------------|
|                                                                                     | direction                                  | magnitude | $x (a)$       | $y (b)$ | $z (c)$ | deby  | magnitude<br>$\times 10^{-4}$<br>esu·cm<br>/Å <sup>3</sup> |
| Mo(1)O <sub>6</sub>                                                                 | C <sub>2</sub> [110]                       | 1.433     | -0.6743       | -6.118  | 2.090   | 6.501 | 108.0                                                      |
| Mo(2)O <sub>6</sub>                                                                 | C <sub>2</sub> [110]                       | 1.171     | 0             | 7.043   | 0       | 7.043 | 117.0                                                      |
| Mo(3)O <sub>6</sub>                                                                 | C <sub>2</sub> [110]                       | 1.302     | -1.196        | 0.2933  | 7.122   | 7.227 | 120.0                                                      |
| PO <sub>4</sub>                                                                     | –                                          | –         | 1.865         | -1.882  | -0.3181 | 2.669 | 44.33                                                      |
| [Mo <sub>5</sub> P <sub>2</sub> O <sub>23</sub> ] <sup>6-</sup> unit <sup>[b]</sup> | –                                          | –         | 0             | -8.371  | 0       | 8.371 | 139.0                                                      |
| [Mo <sub>5</sub> P <sub>2</sub> O <sub>23</sub> ] <sup>6-</sup> unit <sup>[b]</sup> | –                                          | –         | 0             | 8.371   | 0       | 8.371 | 139.0                                                      |
| Cs(1)O <sub>10</sub>                                                                | –                                          | –         | 0             | -3.772  | 0       | 3.772 | 62.66                                                      |
| Cs(2)O <sub>6</sub>                                                                 | –                                          | –         | -1.465        | 1.282   | -0.6708 | 2.059 | 34.20                                                      |
| Cs(3)O <sub>8</sub>                                                                 | –                                          | –         | 1.372         | 0       | 0       | 1.372 | 22.78                                                      |
| Asymmetric unit                                                                     | –                                          | –         | -0.0988       | -3.154  | 8.223   | 8.808 | 146.3                                                      |
| Unit cell                                                                           | –                                          | –         | 0             | 0       | 0       | 0     | 0                                                          |

<sup>[a]</sup> Octahedron distortion,  $\Delta_d$  parameter, is defined as below:

$$\Delta_d = \frac{|(M - O1) - (M - O4)|}{|\cos \theta_1|} + \frac{|(M - O2) - (M - O5)|}{|\cos \theta_2|} + \frac{|(M - O3) - (M - O6)|}{|\cos \theta_3|}$$

where the pairs (O1, O4), (O2, O5), and (O3, O6) are the oxygen atoms that constitute the octahedron and are located in opposite positions from each other.

$\theta_1 = \angle O1-M-O4$ ,  $\theta_2 = \angle O2-M-O5$ , and  $\theta_3 = \angle O3-M-O6$

<sup>[b]</sup> Representation of two opposite directions of the POM units

### Section S7. Comparison of the DSC curves

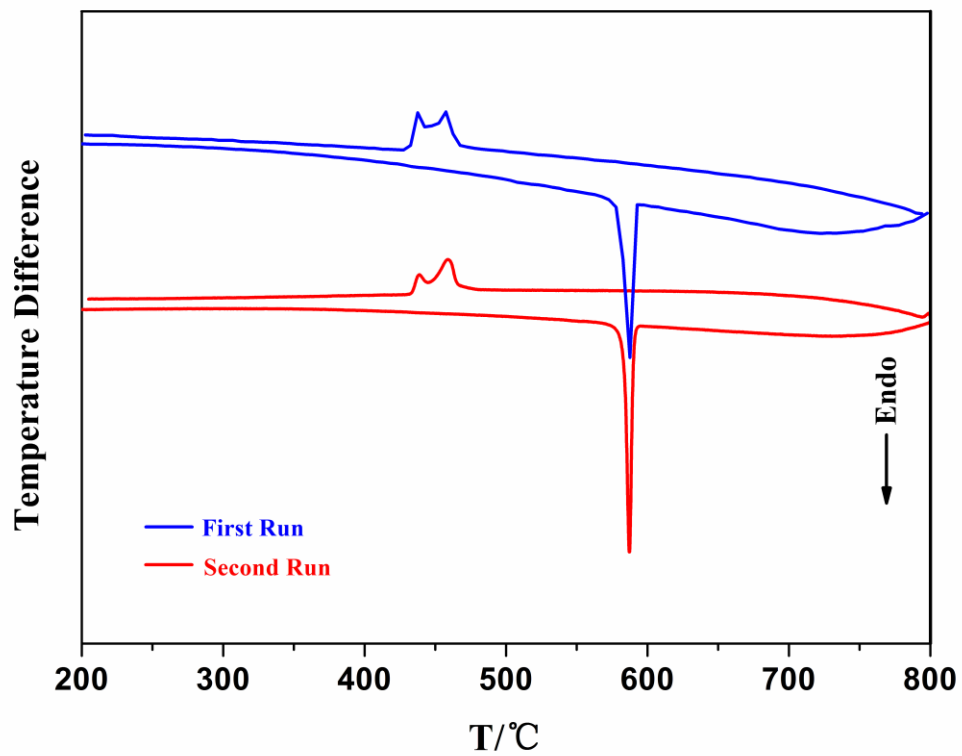

**Fig. S5** Comparison of the DSC curves for  $\text{Cs}_4\text{Mo}_5\text{P}_2\text{O}_{22}$ . The second run performed right after the first run.

## Section S8. References

- S1. (a) J. Tauc, *Mater. Res. Bull.*, 1970, **5**, 721; (b) P. Kubelka and F. Z. Munk, *Tech. Phys.*, 1931, **12**, 593.
- S2. SAINT, *Version 7.60A, Bruker Analytical X-ray Instruments, Inc., Madison, WI*, 2008.
- S3. G. M. Sheldrick, *Acta Crystallogr., Sect. A: Found. Crystallogr.*, 2010, **64**, 112.
- S4. L. Spek, *J. Appl. Crystallogr.*, 2003, **36**, 7.
- S5. S. K. Kurtz and T. T. Perry, *J. Appl. Phys.*, 1968, **39**, 3798.
- S6. J. P. Dougherty and S. K. Kurtz, *J. Appl. Crystallogr.*, 1976, **9**, 145.
